# Supplementary material for: Suitability of Machine Learning Models and their Performance for PM 2.5 Estimation using high-resolution satellite-driven datasets over Northwest India
Source: Research Square preprint supplement (doi:10.21203/rs.3.rs-7959491/v1), 2025-12-15
Supplement: Supplementary file 1 [file 93350d9a616266044a16b93d.docx]

**Figure S1:** Time series of daily average variabilities of PM2.5 in northwest India retrieved through ground based CPCB station, and the red line represented the NAAQS standard concentration for comparison.

**Figure S2:** ThePearson's correlation between the auxiliary meteorological variables, AOD and PM2.5.

**Figure S3:** The MAE and MSEafter cross-validation and hyper-tuning the parameters for better estimation of PM2.5 over the study region..

**Figure S4:** Feature Importance analysis of variables used as input for machine learning models (RF, SVM, XGBoost, and AdaBoost) to estimate the PM2.5 over northwest India.

**Table S1**: The spatial and temporal resolution of variables used to estimate the PM2.5 concentration over northwest Indian region.

**Table S2:** The descriptive statistics of all the parameters used in the study to estimate PM2.5.


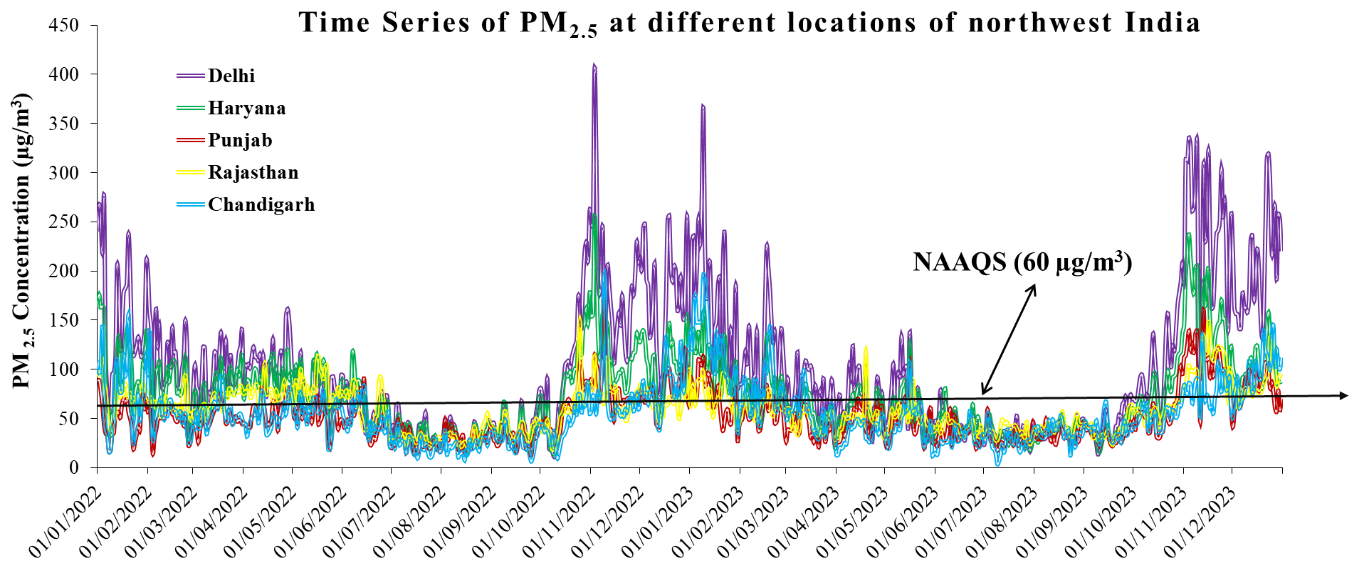


**Figure S1:** Time series of daily average variabilities of PM2.5 in northwest India retrieved through ground based CPCB station, and the red line represented the NAAQS standard (60 µg/m3) concentration for comparison.


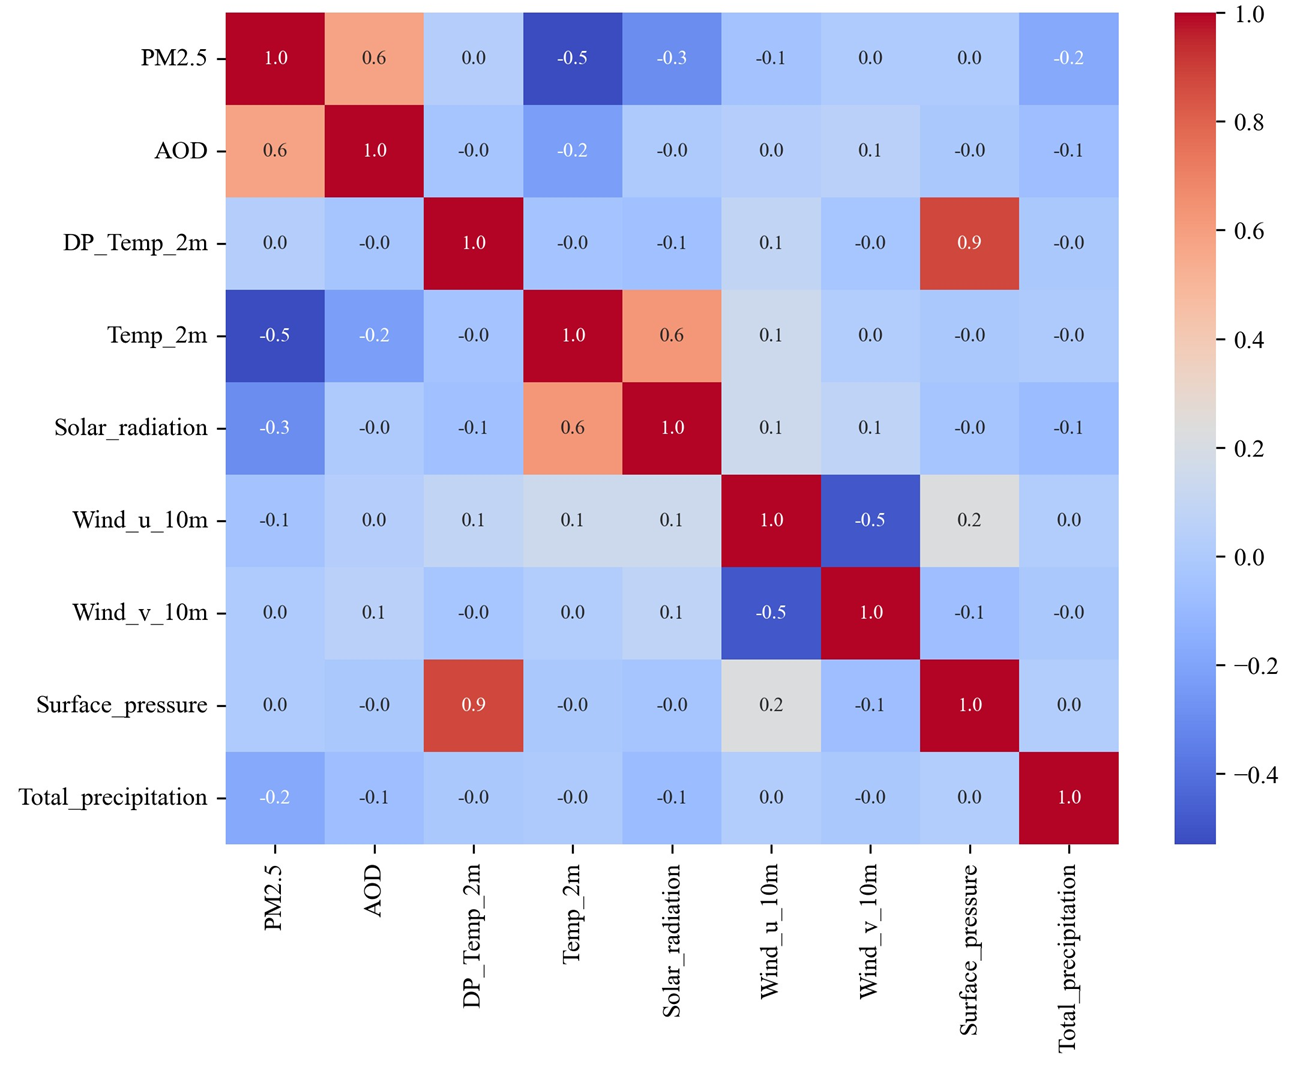


**Figure S2:** ThePearson's correlation between the auxiliary meteorological variables, AOD and PM2.5.


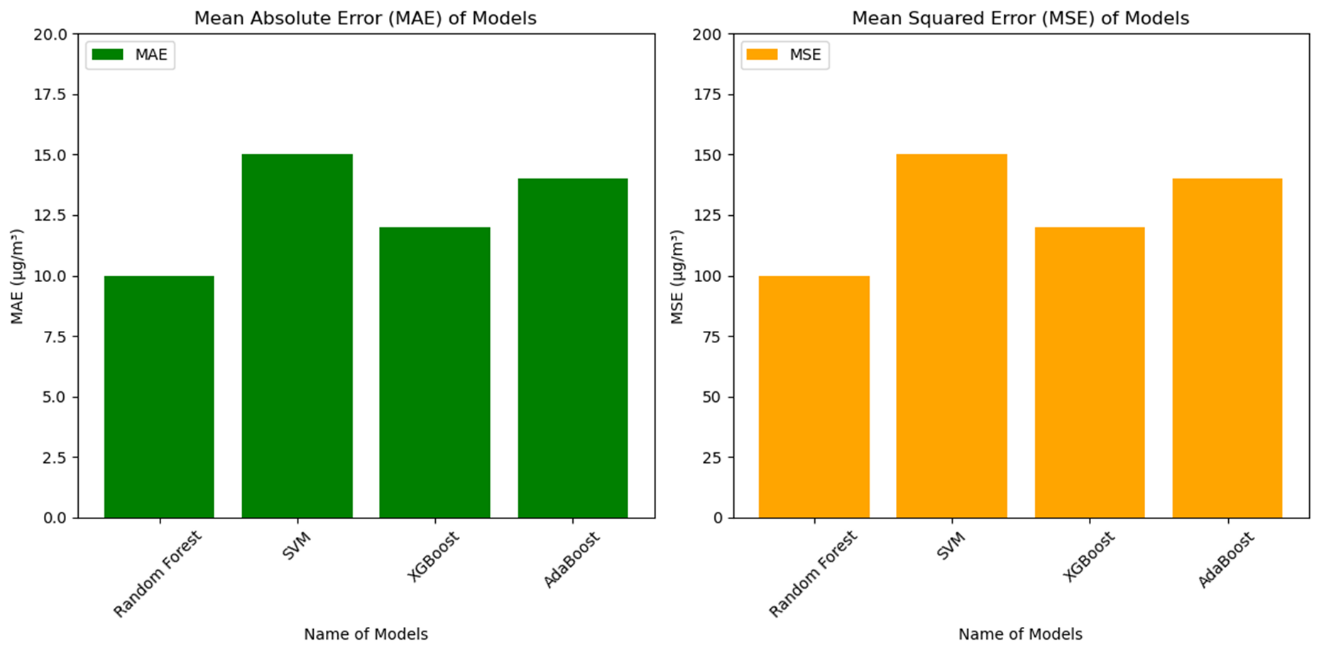


**Figure S3:** The MAE and MSEafter cross-validation and hyper-tuning the parameters for better estimation of PM2.5 over the study region.


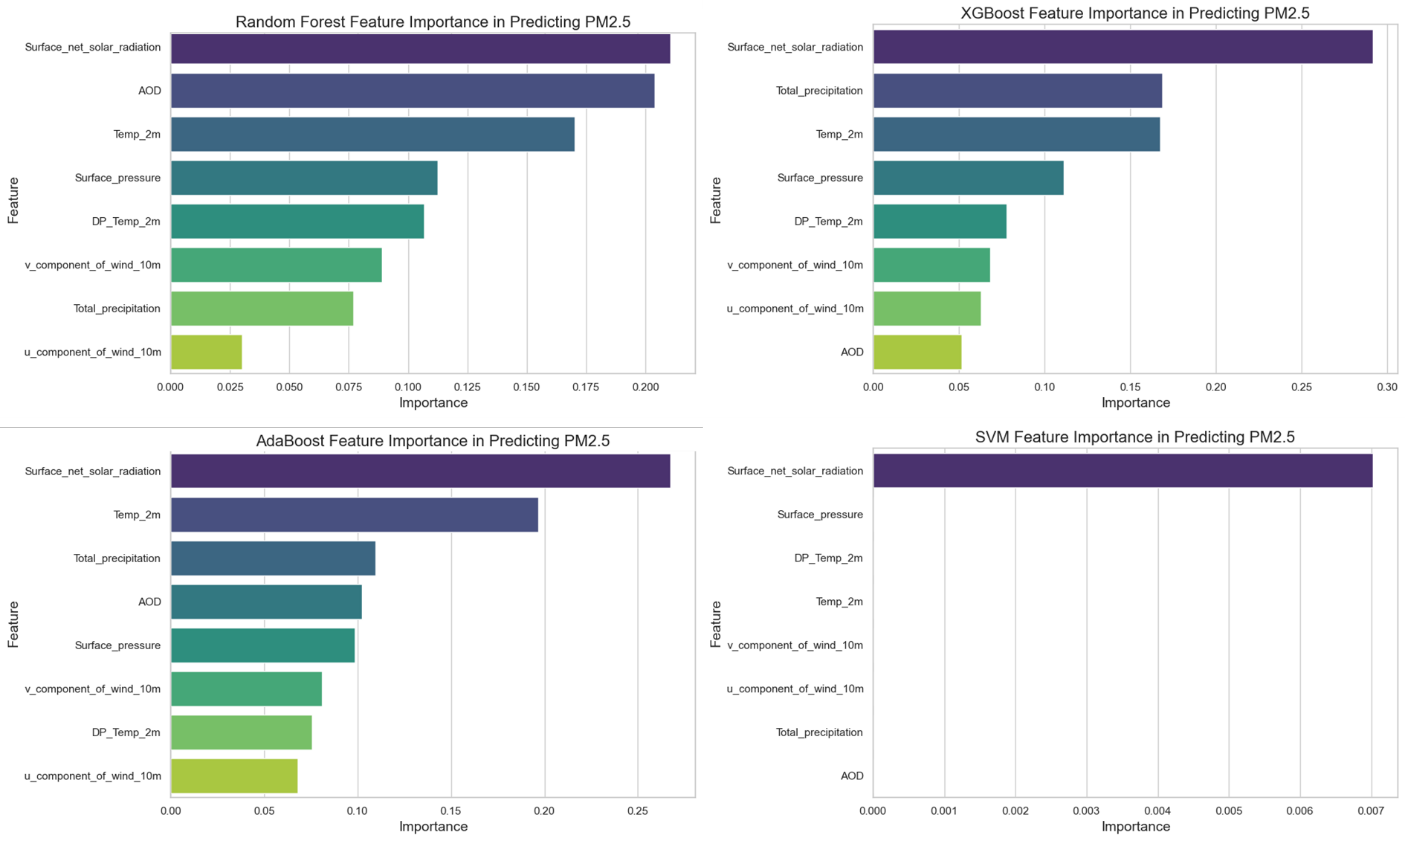


**Figure S4:** Feature Importance analysis of variables used as input for machine learning models (RF, SVM, XGBoost, and AdaBoost) to estimate the PM2.5 over northwest India.

**Table S1**: The spatial and temporal resolution of variables used to estimate the PM2.5 concentration over northwest Indian region.

| **Sl. No.** | **Variable** | **Spatial Resolution** | **Temporal Resolution** | **Unit** |
| --- | --- | --- | --- | --- |
| 1 | PM2.5 (CPCB) | Station Point | 15 minutes | µg/m3 |
| 2 | MAIAC AOD | 1km | Daily | - |
| 3 | Dew point temperature | 0.1° × 0.1° | Hourly | K |
| 4 | Temperature at 2m | 0.1° × 0.1° | Hourly | K |
| 5 | Surface Pressure | 0.1° × 0.1° | Hourly | Pa |
| 6 | Total Precipitation | 0.1° × 0.1° | Hourly | mm/day |
| 7 | Net Solar Radiation | 0.1° × 0.1° | Hourly | w/m2 |
| 8 | u and v components of wind | 0.1° × 0.1° | Hourly | m/s |

**Table S2:** The descriptive statistics of all the parameters used in the study to estimate PM2.5.

| **Descriptive**  **Statistics** | **PM2.5 (µg/m3)** | **AOD** | **DP_Temp (K)** | | **Temp_2m**  **(K)** | **u_component_of_wind_10m (m/s)** | **v_component_of_wind_10m(m/s)** | **Surface_pressure (**Pa) | **Surface_net_solar_radiation**  **(W/m2)** | **Total_precipitation (mm/day)** |
| --- | --- | --- | --- | --- | --- | --- | --- | --- | --- | --- |
| Mean | 71.05 | 0.51 | | 279.11 | 290.45 | 0.32 | -0.57 | 93684.78 | 1.468221e+07 | 1.414313e-03 |
| Std. Dev | 37.01 | 0.24 | | 7.56 | 11.26 | 1.41 | 1.05 | 9645.11 | 1.468221+06 | 5.181644e-03 |
| Min | 17.96 | 0.01 | | 252.41 | 260.60 | 0.32 | -3.07 | 71216.66 | 1.479490e+06 | 0.000000e+00 |
| Max | 221.36 | 2.21 | | 292.50 | 308.77 | 4.22 | 3.59 | 99573.80 | 2.300000e+07 | 6.686551e-02 |
